# Supplementary material for: Cumulative Impact of Environmental Pollution and Population Vulnerability on Pediatric Asthma Hospitalizations: A Multilevel Analysis of CalEnviroScreen
Source: PubMed Central journal article supplement (PMC6696276; doi:10.3390/ijerph16152683), 2019-07-27
Supplement: ijerph-16-02683-s001.pdf [file ijerph-16-02683-s001.pdf]

# Supplementary Materials

**Table S1.** CalEnviroScreen Indicators at the Zip Code-level, Description and Data Source.

| Indicator                                           | Description and Data Source                                                                                                                                                          |
|-----------------------------------------------------|--------------------------------------------------------------------------------------------------------------------------------------------------------------------------------------|
| CalEnviroScreen score                               | The average percentile ranks of the indicators below, weighted by the highest ranking score and multiplied by 10                                                                     |
| Pollution burden score                              | The average of percentile rank scores of exposure indicators and the environmental effects indicators one-half weighted, weighted by the highest ranking score and multiplied by 10  |
| Ozone (ppm)                                         | Portion of the daily maximum 8-h ambient concentration over the federal standard (2007–2009 CARB)                                                                                    |
| Particulate matter 2.5 ( $\mu\text{g}/\text{m}^3$ ) | Annual mean ambient concentration (2007–2009 CARB)                                                                                                                                   |
| Diesel particulate matter (kg/d)                    | Emissions from on-road and nonroad sources for a 2010 summer day in July (CARB)                                                                                                      |
| Pesticide use (ln lb/square mile)                   | Selective active ingredients used in production agriculture (2009–2010 California Department of Pesticide Regulation)                                                                |
| Toxic releases (ln toxicity weighted lb/y)          | Releases to air or water (2008–2010 Toxics Release Inventory, US Environmental Protection Agency)                                                                                    |
| Traffic density (vehicle-km per h/km)               | Traffic volume by road length within 150 meters of zip code boundary (2004 CEHTP, CDPH)                                                                                              |
| Cleanup site (ln weighted sum)                      | Cleanup sites weighted by site type and status (2013 DTSC EnviroStor database)                                                                                                       |
| Groundwater threats (ln weighted sum)               | Potential contamination sources and monitoring wells, weighted by site type and status (2013 SWRCB GeoTracker database)                                                              |
| Hazardous waste sites (weighted sum)                | Permitted hazardous waste facilities and generators, weighted by waste type and volume (2013 DTSC EnviroStor database)                                                               |
| Impaired water bodies (sum of pollutants)           | Number of pollutants across water bodies designated as impaired (2010 SWRCB 303(d) List of Impaired Water Bodies)                                                                    |
| Solid waste sites (weighted sum)                    | Solid waste facilities, operations, and disposal sites, weighted by site type and status (2013 SWIS and CIA Disposal Sites Program, Department of Resources, Recycling and Recovery) |
| Population characteristics score                    | The average percentile ranks of the indicators below, weighted by the highest ranking score and multiplied by 10                                                                     |
| Children and older adults (%)                       | % population aged <10 y or >65 y (2010 US Census Bureau)                                                                                                                             |
| Asthma emergency department (visits per 10,000/y)   | Spatially modeled, age-adjusted rate of emergency department visits (2007–2009 CEHTP, Office of Statewide Health Planning and Development)                                           |
| Low birth weight (%)                                | % births weighing <2500 g (2007–2011 CDPH Vital Statistics)                                                                                                                          |
| Educational attainment (%)                          | % population aged >25 y with <high school education (2007–2011 ACS 5-y estimates, US Census Bureau)                                                                                  |
| Linguistic isolation (%)                            | % households in which no one aged $\geq 14$ y speaks English “very well” (2007–2011 ACS 5-y estimates, US Census Bureau)                                                             |
| Poverty (%)                                         | % population living below twice the federal poverty level (2007–2011 ACS 5-y estimates, US Census Bureau)                                                                            |
| Race/ethnicity (%)                                  | % non-white (2007–2011 ACS 5-y estimates, US Census Bureau)                                                                                                                          |

*Note.* ACS= American Community Survey; CDPH= California Department of Public Health; CEHTP= California Environmental Health Tracking Program; CARB= California Air Resources Board; CIA= Closed, Illegal, and Abandoned; DTSC= Department of Toxic Substances Control; PM= particulate matter; SWIS= Solid Waste Information System; SWRCB= State Water Resources Control Board.
